# Supplementary material for: Transcriptome Analysis of Alternative Splicing Events Induced by Arbuscular Mycorrhizal Fungi (Rhizophagus irregularis) in Pea (Pisum sativum L.) Roots
Source: MDPI journal article supplement (doi:10.3390/plants9121700), 2020-12-03
Supplement: s1 [file s1]

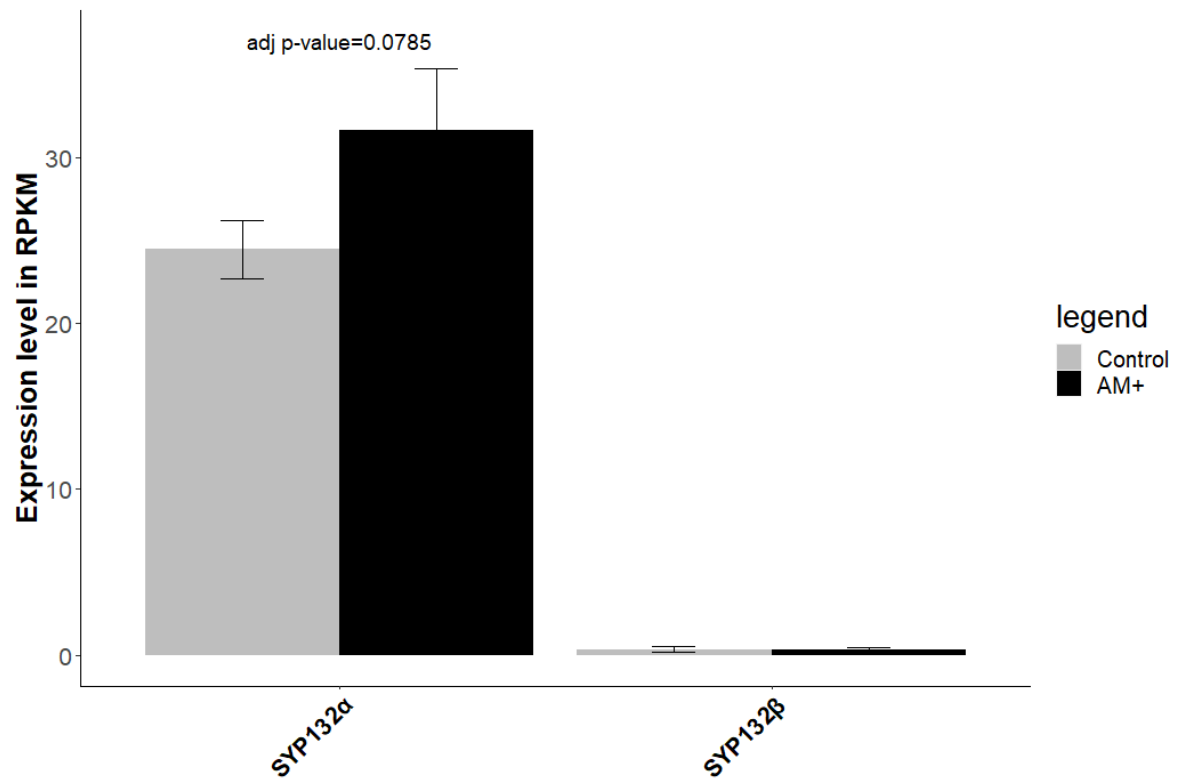

**Figure S1.** Isoforms expression analysis SYP132 gene in *P. sativum*. P-value was adjusted by Benjamini Hochberg correction method.
